# Supplementary material for: Specific N-terminal protein labelling: use of FMDV 3Cpro protease and native chemical ligation
Source: Royal Society of Chemistry journal article supplement (doi:10.1039/b806727a), 2008-01-01
Supplement: b806727a.pdf [file b806727a.pdf]

Electronic supplementary information for

## Specific N-terminal Protein Labelling: Use of FMDV 3C<sup>pro</sup> Protease and Native Chemical Ligation

Gillian K. Busch<sup>a</sup>, Edward W. Tate<sup>a</sup>, Piers R.J. Gaffney<sup>a</sup>, Erika Rosivatz<sup>b</sup>, Rudiger Woscholski<sup>b</sup>, and Robin J. Leatherbarrow<sup>\*a</sup>

<sup>a</sup> Department of Chemistry, Imperial College London' South Kensington Campus, London SW7 2AZ, Fax: (+44) (0)20 7594 1139, E-mail: r.leatherbarrow@imperial.ac.uk

### Engineering the pGEX\_3C\_PH plasmid and plasmid map

10

#### pGEX\_3C\_PH Construct

pGEX 4T-1 was double digested *Bam*H I and *Eco*R I. The PAKQC insert flanked with a 5' *Bam*H I and 3' *Eco*R I overhangs (FWD – 5'-GAT TC CCG GCG AAA CAG TGT G, *Bam*H I overhang-PAKQC; REV – 5'-G GGC CGC TTT GTC ACA ctt aa, PAKQC-EcoR I overhang) was ligated into the linearized vector, generating the vector pGEX\_3C. The PH Domain gene was amplified by PCR with the primers PH5'*Eco*R I (5'-AAA CCG GAA TTC CGT ATG AGC GAC GTG GC, *Eco*R I-5' PH Domain) and PH3'*Sal* I (5'-AAC GCG TCG ACC TCA GCC CGA ACG GAA G, 3' PH Domain-Sal I). The purified PCR product was digested with *Eco*R I and *Sal*I, and ligated to pGEX\_3C linearized with the same restriction enzymes, generating the vector pGEX\_3C\_PH. Constructs were verified by DNA Sequencing.

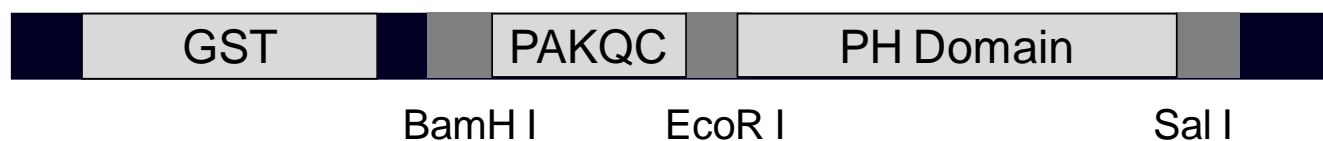

20 Figure S1: Section of the pGEX\_3C\_PH plasmid, detailing the GST tag and PAKQC and PH Domain inserts within the multiple cloning site
